# Supplementary material
Source: publisher figshare collection journal article supplement (https://frontiersin.figshare.com/ndownloader/files/31700459)
Supplement: Supplementary file 1 [file 31700459]

## *Supplementary Material*

### **1 Organization Interview Tool**

#### I. Spatial area

*You might remember that part of the STEW-MAP survey involved describing the places that you care for. Here is the map of the area your group described within our project area (Kona and Ko'olaupoko) in 2018- [ask whether participant has map open, wants to open it, or if they want you to just share your screen].*

1. Can you talk about why your organization works where you work? *[Prompts: landmark, area provided to lease, wahi pana]*

#### II. Recent changes

*Now I would like you to think about recent changes that have occurred in your organization since March of this year. These changes we are referring to have resulted from local, national, and worldwide events, and are not just a result of the COVID-19 pandemic, but also the growing awareness of and response to institutionalized racism and social injustices. In the following questions, when I say "since March", I am referring to these shifts.*

2. Has your group has been impacted by the events since March? If so, how?
  - a. Probe for programs, priorities, or goals? If so, what are those?
  - b. Probe for how work with volunteers/members has changed (e.g. cancelled events, physically distanced, more interest from new volunteers)
  - c. Probe for virtual content / engagement
  - d. Probe for change of area [change in access, physical sites closing, moving meetings or fundraisers online, needing to accommodate people spending more time in outdoor spaces]
  - e. Probe for changes to staff, interns, field work
  - f. Probe for funding (loss or gain), probe for adaptation
  - g. Probe for mutual aid/ community relief work.
  - h. Probe for knowledge network--where have you been getting ideas for the new programs? *[note: this may be repetitive of network questions below]*
  - i. Probe for any comments on working in communities that are particularly impacted by (or not) to COVID-19.
3. *[If new programs/activities are mentioned]*, Why has your organization taken this on?
  - a. Probe for if and how needs of the community changed
4. These changes within your organization that you've mentioned, do you see them as long term changes or short term responses to recent events?

5. Do you think the current context (i.e., since March) has shifted how people understand and value stewardship and the groups that engage in stewardship? If so how?

### III. Networks

*Ok, now we're going to think more broadly and not focus on recent changes. You might remember in the STEW-MAP survey—that we asked you to list organizations that you collaborate with. We're going to look at the social network map of your regular collaborator network based on your responses to the survey [ask whether participant has map open, wants to open it, or if they want you to just share your screen].*

*Let me explain a couple of things to help you interpret this diagram. This is what is considered a visualization of your organization's ego network. You'll see your organization in big letters with lots of arrows around it. The blue arrows point to the organizations that you named as regular collaborators. The orange arrows come from organizations that named you as a regular collaborator. Orange arrows also connect your collaborators if they named each other as collaborators. The full names of for these abbreviated organizations can be found on the second page.*

6. Is this what you would have expected your network to look like? Are there any surprises here?
7. Now think about your group's strongest collaborations in this network. What makes them strong? How did they come to be?
8. How long have you worked for [organization name]? Do you have a sense for if and how the network has changed over the last 10 years? [If yes,] Please explain.
9. Has your group's network of key collaborators changed since this March? Have you begun new or different kinds of collaborations?
  - a. Probe for sector (public, civic, private) if unclear
  - b. Probe for type of collaboration regular collaboration/ resources/knowledge-data-expertise
  - c. Probe for if the connection is entirely new or pre-existing
  - d. Probe for the WHY they think networks are changing

### IV. Successful collaborations and the future of mālama 'āina

*Thanks so much for reflecting on your group's networks. We have found that the networks in which stewardship groups work are very large and include organizations across a variety of sectors and scales. We are interested in hearing more of the stories about strong collaborations.*

10. Can you think of a memorable time when your organization has collaborated with other groups particularly well to meet shared goals? How did it work, why was it so successful?
- a. Probe for what could have improved collective efforts

11. What are the major limitations your group faces in pursuit of your mission? [*clarify: does not have to be related to recent events*]

[*If funding is mentioned*] The results from our survey show that that funding is a top need for organizations that mālama 'āina. Beyond securing funding, are there other challenges that your group faces in pursuit of your mission?

12. What is your hope for the future of stewardship or mālama 'āina in Hawai'i?

## 2 Volunteer Survey



### Volunteer COVID-19 Survey

Since March 2020, the COVID-19 pandemic has changed the way we interact and engage with others. Due to shutdowns and social distancing, like other businesses, environmental stewardship organizations, or 'āina-based organizations, have been affected in many ways. These 'āina-based organizations take care of, or mālama 'āina, by conserving, managing, monitoring, transforming, advocating for, restoring, or educating the public about the local environment. Much of their work needs to get done by having "boots on the ground."

The purpose of this survey is to get a better understanding of how the current context has impacted the views and engagement of volunteers with 'āina-based organizations. The results of this survey may be important for highlighting the value of 'āina-based organizations for community health and well-being, especially as we transition further into new ways of being. It may also help these organizations understand how to adapt so that their volunteers feel safe.

This quick survey includes questions regarding your involvement with 'āina-based organizations and includes optional opportunities to elaborate on your answers.

[Next](#)

Page 1 of 11

Never submit passwords through Google Forms.

This form was created inside of University of Hawaii. [Report Abuse](#)

## Consent Form: COVID-19 Volunteer Survey Description and Agreement to Participate

Aloha! You are invited to participate in a survey for research that is being conducted by Heather McMillen of the Division of Forestry and Wildlife (DOFAW) and Rachel Dacks of the University of Hawai'i at Mānoa. This study is covered under the University of Hawai'i at Mānoa Institutional Review Board (IRB) application #2017-00331.

This survey is for individuals who currently engage with 'āina-based organizations and/or engaged with them prior to March 2020. The purpose of this survey is to get a better understanding of how the current context has impacted the views and engagement of volunteers with 'āina-based organizations. These 'āina-based organizations take care of, or mālama 'āina, by conserving, managing, monitoring, transforming, advocating for, restoring, or educating the public about the local environment. The results of this survey may be important for highlighting the value of 'āina-based organizations for community health and well-being, especially as we transition further into new ways of being.

### Activities and Time Commitment:

Completing the survey will take you approximately 5-10 minutes. You will be asked for information about your engagement with and perception of 'āina-based organizations during COVID-19. Example questions include: "Prior to March 2020, how many 'āina-based organizations did you regularly engage with?" and "Have the events around COVID changed how you value 'āina-based organizations?"

The Investigators and the University of Hawai'i at Mānoa IRB are the only ones with access to the data, except as required by law.

The information collected in this survey will be aggregated and summarized in reports that will be distributed to relevant government and non-governmental organizations (including the organization(s) that you engage with). The information may also be incorporated into peer-reviewed publications. With additional consent, any quotes used from your responses will be used anonymously.

### Voluntary Participation:

Participation in the study is completely voluntary. You may choose not to participate, and you may withdraw at any time during or after the survey without any penalty or loss to you. In addition, you may choose not to answer any questions with which you are not comfortable.

### Benefits and Risks:

There are no foreseeable risks to participation in this study. The only anticipated cost is the amount of time you provide to complete the survey. There are no direct benefits from taking part in this study. You may become stressed or uncomfortable answering any of the survey questions. If you do become stressed or uncomfortable, you can skip the question or take a break. You can also stop taking the survey or you can withdraw from the project altogether.

### Privacy and Confidentiality:

This research is anonymous. Anonymous means that we do not collect any identifying information with your responses. We do ask some questions about your demographics, but we do not believe these can be used to identify you. The collected data will be stored on a password protected computer. Other agencies that have legal permission have the right to review research records. The University of Hawai'i Human Studies Program has the right to review research records for this study.

### Future Research Studies:

The anonymous data may be used for future research studies or distributed to another investigator for future research studies and we will not seek further approval from you for these future studies.

### Questions:

If you have any questions about this study, please call or email Heather McMillen ([hmcmlle@hawaii.edu](mailto:hmcmlle@hawaii.edu) or (808) 587-0054). You may contact the UH Human Studies Program at (808) 956-5007 or [uhirb@hawaii.edu](mailto:uhirb@hawaii.edu) to discuss problems, concerns, and questions; obtain information; or offer input with an informed individual who is unaffiliated with the specific research protocol. Please visit <https://www.hawaii.edu/researchcompliance/information-research-participants> for more information on your rights as a research participant.

Agreement to Participate in Stewardship Mapping in Hawai'i Project

If you are 18 years of age or older, understand the statements above, and will consent to participate in the study, click "I Agree" and begin the survey. If not, please click "I Do Not Agree." \*

☐ I Agree

☐ I Do Not Agree

‘Āina-based organizations take care of, or mālama ‘āina, by conserving, managing, monitoring, transforming, advocating for, restoring, or educating the public about the local environment.

**Before the pandemic**, how many ‘āina-based organizations did you regularly (at least once a year) engage with? \*

(Engage: volunteer, attend in-person or online events/programs, receive services...)

Your answer

*Optional: List organizations & type of engagement (volunteer, attend events, programs)*

Your answer

**Since the pandemic**, how many ‘āina-based organizations have you engaged with? \*

(Engage: volunteer, attend in-person or online events/programs, receive services...)

Your answer

*Optional: List organizations & type of engagement (volunteer, attend events, programs)*

Your answer

Back

Next

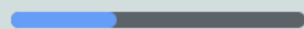

Page 4 of 11

Since the beginning of the pandemic, how much time have you spent engaging with 'āina-based organizations? \*

A lot more   A little more   Same   A little less   A lot less

I've engaged  
with 'āina-based  
organizations...

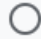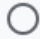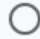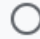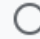

*Optional: Explain why*

Your answer

Back

Next

Page 5 of 11

Has the pandemic changed how you value 'āina-based organizations? \*

(Thinking about ALL organizations, not just the ones you engage with)

A lot more   A little more   No change   A little less   A lot less

I now value  
'āina-based  
organizations...

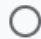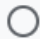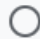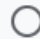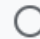

*Optional: Explain why*

Your answer

Back

Next

Page 6 of 11

If the time you spent engaging with 'āina-based organizations has changed since the pandemic started, how has this change affected you?

Your answer

---

Back

Next

Page 7 of 11

What do you need to feel safe and comfortable when engaging with an 'āina-based organization (volunteering, attending work day, etc.)? \*

- ☐ Be able to social distance
- ☐ A limit to the number of participants
- ☐ All present must be required to wear a face mask
- ☐ Everyone must have their temperature taken to be able to participate
- ☐ Safety questions are asked of all participants upon arrival (symptoms, travel, etc.)
- ☐ All tools are washed between use or participants are required to bring their own tools
- ☐ If food is eaten with others, it is not a potluck and either one person serves cafeteria-style or there are individually wrapped servings prepared in advance.
- ☐ None
- ☐ Other: 

---

Back

Next

Page 8 of 11



The following questions are *OPTIONAL* but we would love to hear your thoughts!

Has the pandemic shifted the reasons why you volunteer to engage w/ 'āina?

Your answer

What have you missed the most about volunteering with 'āina-based organizations?

Your answer

Since the beginning of the pandemic, have you changed how you engage with the 'āina (or see/value nature) around your own home/neighborhood/community?

Your answer

Back

Next

 Page 9 of 11

## Demographics

Age

Your answer \_\_\_\_\_

Gender

- ☐ Female
- ☐ Male
- ☐ Non-binary/third gender
- ☐ Other: \_\_\_\_\_

Ethnicity (select all that apply)

- ☐ African American
- ☐ Alaskan Native
- ☐ American Indian
- ☐ Chinese
- ☐ Caucasian
- ☐ Filipino
- ☐ Hispanic or Latino
- ☐ Japanese
- ☐ Korean
- ☐ Native Hawaiian
- ☐ Samoan
- ☐ Vietnamese
- ☐ Other Asian
- ☐ Other Pacific Islander
- ☐ Other: \_\_\_\_\_

Zip Code

Your answer

How many years have you lived in Hawai'i?

Your answer

Back

Next

Page 10 of 11

### Quote Consent

Would it be okay if we potentially quote any of your responses for future reports and/or publications? Any quotes used will be anonymously. \*

☐ Yes

☐ No

Back

Submit

Page 11 of 11
